# Supplementary material
Source: ML conference proceedings conference paper supplement (https://proceedings.neurips.cc/paper_files/paper/2007/hash/072b030ba126b2f4b2374f342be9ed44-Abstract.html)
Supplement: Supplementary file [file 072b030ba126b2f4b2374f342be9ed44-Supplemental.zip]

# FilterBoost: Regression and Classification on Large Datasets

Booster using logistic loss function, for conditional probability estimation and classification.

## Setting: Boosting-by-Filtering

- ▶ Uses example oracle, not fixed training set
- ▶ Useful e.g. with extremely large datasets

## Results

- ▶ Provably achieves arbitrarily low test error
- ▶ Realistic assumptions
- ▶ Empirically fast and robust
